# Supplementary material for: Quantitative Measurement of Plasma Free Metanephrines by a Simple and Cost-Effective Microextraction Packed Sorbent with Porous Graphitic Carbon and Liquid Chromatography-Tandem Mass Spectrometry
Source: Hindawi journal article supplement (doi:10.1155/2021/8821276), 2021-02-04
Supplement: f1 [file 8821276.f1.pdf]

## Supplementary Materials

Quantitative measurement of plasma free metanephrines by a simple and cost-effective microextraction by packed sorbent with porous graphitic carbon and liquid chromatography-tandem mass spectrometry

Xin Xiong<sup>1,2</sup>, Yuanyuan Zhang<sup>1,2</sup>, Rongsheng Zhao<sup>1,2\*</sup>

<sup>1</sup> Department of Pharmacy, Peking University Third Hospital, Beijing, 100191, China

<sup>2</sup> Therapeutic Drug Monitoring and Clinical Toxicology Center of Peking University, Beijing, 100191, China.

---

\* Corresponding author. Fax: +86 10 82266673.  
E-mail address: zhaorongsheng@bjmu.edu.cn (R. Zhao)

Table S1. MRM transitions and respective fragmentation parameters for tandem mass spectrometric analysis of metanephtrines and their respective deuterated internal standards.

| Compound        | Q1  | Q3    | DP (V) | EP (V) | CE (eV) | CXP (V) |
|-----------------|-----|-------|--------|--------|---------|---------|
| MN (quant.)     | 180 | 148.1 | 90     | 10     | 23      | 11      |
| MN (qual.)      | 180 | 165.1 | 90     | 10     | 23      | 11      |
| MN-d3 (quant.)  | 183 | 151.1 | 90     | 10     | 25      | 11      |
| MN-d3 (qual.)   | 183 | 168.1 | 90     | 10     | 22      | 11      |
| NMN (quant.)    | 166 | 134.1 | 60     | 10     | 22      | 11      |
| NMN (qual.)     | 166 | 106.1 | 60     | 10     | 32      | 11      |
| NMN-d3 (quant.) | 169 | 137.1 | 90     | 10     | 23      | 11      |
| NMN-d3 (qual.)  | 169 | 109.1 | 90     | 10     | 30      | 11      |

Abbreviations: Q1, precursor ion mass; Q3, product ion masses; DP, declustering potential; EP, entrance potential; CE, collision energy; CXP, cell exit potential.

Table S2. Deviations from baseline concentrations of plasma metanephrines for exogenous and endogenous potential interferences

| Exogenous interference and its metabolite (t <sub>R</sub> , min) | Test concentration (μg/mL) | MN deviation (%) | NMN deviation (%) | Endogenous interference (t <sub>R</sub> , min) | Test concentration (μg/mL) | MN deviation (%) | NMN deviation (%) |
|------------------------------------------------------------------|----------------------------|------------------|-------------------|------------------------------------------------|----------------------------|------------------|-------------------|
| Theobromine                                                      | 100                        | 2.3              | -1.3              | Tryptophan                                     | 200                        | -12.1            | -9.2              |
| Acetaminophen                                                    | 200                        | 9.8              | 1.3               | Phenylalanine                                  | 200                        | -7.3             | 0.0               |
| Labetalol                                                        | 100                        | 10.4             | 10.7              | Tyrosine                                       | 1000                       | 3.6              | -2.7              |
| Amitriptyline                                                    | 10                         | 9.0              | 8.5               | Melatonin                                      | 165                        | 7.0              | -4.7              |
| Pseudoephedrine                                                  | 10                         | 8.3              | 2.2               | Uric acid                                      | 500                        | -14.6            | -10.5             |
| Diphenhydramine                                                  | 10                         | -2.5             | 7.2               | Ascorbic acid                                  | 200                        | -10.5            | -4.6              |
| Theophylline                                                     | 100                        | -1.6             | 13.5              | Urea                                           | 2000                       | -0.9             | -5.3              |
| Carbidopa                                                        | 100                        | -13.7            | -0.5              | Glucose                                        | 2000                       | 5.8              | 2.4               |
| Levodopa ( <b>1.20</b> )                                         | 100                        | 11.0             | 5.7               | Riboflavin                                     | 108                        | 14.4             | 7.5               |
| Salicylic acid                                                   | 1000                       | 0.1              | 1.3               | 4-OH-3-methoxyphenyl glycol                    | 1000                       | 1.9              | -14.1             |
| Clonidine                                                        | 10                         | 5.2              | 13.8              | 5-Hydroxytryptophol                            | 100                        | 14.5             | -4.9              |
| Isoetharine ( <b>2.70</b> )                                      | 100                        | -7.3             | 14.4              | Nicotinamide                                   | 500                        | -5.2             | -13.5             |
| Isoproterenol ( <b>1.13</b> )                                    | 100                        | 8.2              | -0.8              | Pyridoxal 5-phosphate                          | 500                        | -5.6             | -7.9              |

|                                 |      |      |       |                                |      |       |       |
|---------------------------------|------|------|-------|--------------------------------|------|-------|-------|
| 3-O-methyl-dopa ( <b>5.09</b> ) | 10   | -1.6 | -0.8  | Thiamine                       | 200  | 4.2   | 1.2   |
| Methyldopa                      | 100  | -9.5 | 11.9  | Nicotinutric acid              | 200  | -13.5 | -9.3  |
| MDA ( <b>2.06</b> )             | 100  | -1.7 | 5.9   | Nicotinic acid                 | 200  | -11.3 | 3.3   |
| HMMA ( <b>2.46</b> )            | 100  | 9.7  | -13.7 | Pyridoxal                      | 200  | -10.7 | -9.9  |
| PMMA ( <b>1.93</b> )            | 100  | -3.6 | 3.2   | 5-Hydroxyindoleacetic acid     | 100  | -5.4  | 2.6   |
| Amine mixtures                  |      |      |       | 3-O-methyltyramine             | 200  | -2.4  | -4.6  |
| (phentermine, MDEA,             | 100  | 5.5  | 4.4   | Norepinephrine                 | 100  | 9.7   | 11.1  |
| amphetamine, MDMA, MA,          |      |      |       | 3,4-Dihydroxymandelic acid     | 1000 | 3.5   | 13.4  |
| MDA) ( <b>1.6-2.2</b> )         |      |      |       | 3,4-Dihydroxyphenylacetic acid | 1300 | -0.1  | 3.1   |
| Drug mixtures                   |      |      |       | Epinephrine ( <b>5.51</b> )    | 100  | -2.7  | -12.1 |
| (Ibuprofen, Naproxen,           | 1000 | 13.2 | 11.3  | Dopamine                       | 100  | 3.5   | 11.9  |
| Cotinine, Nicotine, Caffeine)   |      |      |       | Homovanillic acid              | 100  | 6.4   | -8.0  |
|                                 |      |      |       | Vanillylmandelic acid          | 100  | 14.7  | -8.2  |

MDA: 3,4-methylenedioxyamphetamine; HMMA: 4-hydroxy-3-methoxymethamphetamine; PMMA: 4-methoxymethamphetamine; MDEA: 3,4-methylenedioxyethylamphetamine; MDMA: 3,4-methylenedioxyamphetamine; MA: methamphetamine.

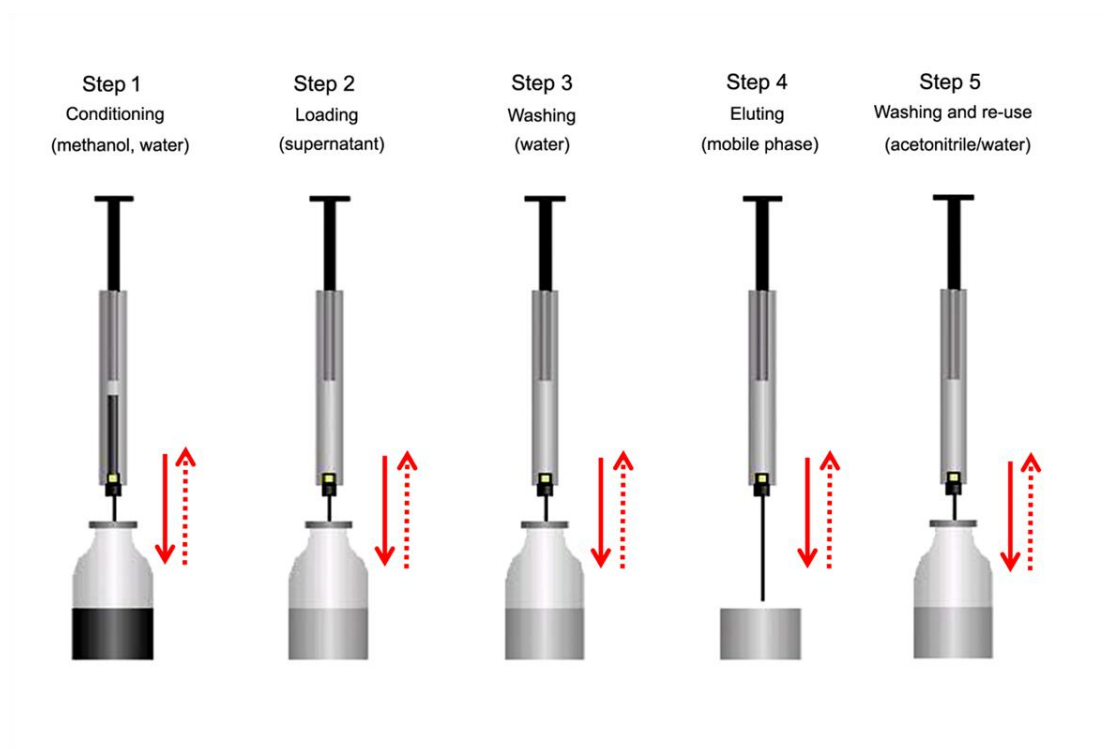

Figure S1 Schematic diagram of operation course of MEPS

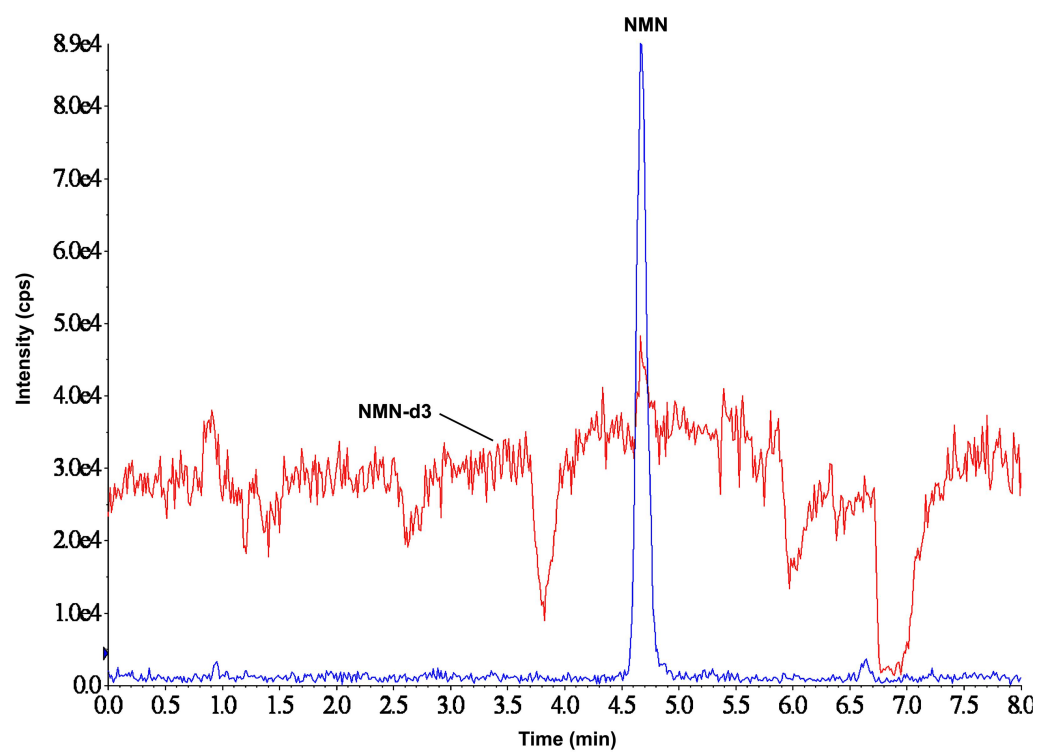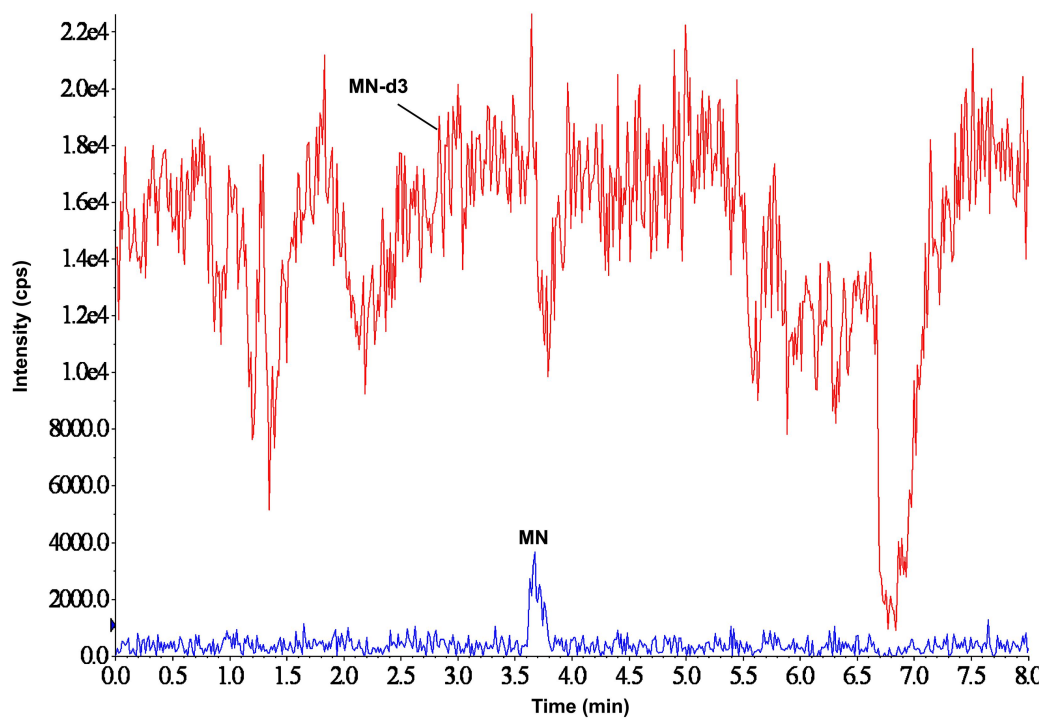

Figure S2 Post-column infusion experiment.
